# Supplementary material for: DO-SRS imaging of metabolic dynamics in aging Drosophila
Source: Royal Society of Chemistry journal article supplement (doi:10.1039/d1an01638e), 2021-01-01
Supplement: d1an01638e1.pdf [file d1an01638e1.pdf]

## Supplement materials

### DO-SRS Imaging of Metabolic Dynamics in Aging *Drosophila*

Yajuan Li, Wenxu Zhang, Anthony A. Fung, Lingyan Shi\*

Department of Bioengineering, University of California San Diego

**Key words:** Stimulated Raman scattering, DO-SRS, *Drosophila*, aging, metabolic dynamics, lipid metabolism, fat body

Corresponding to: [Lingyanshi@ucsd.edu](mailto:Lingyanshi@ucsd.edu)

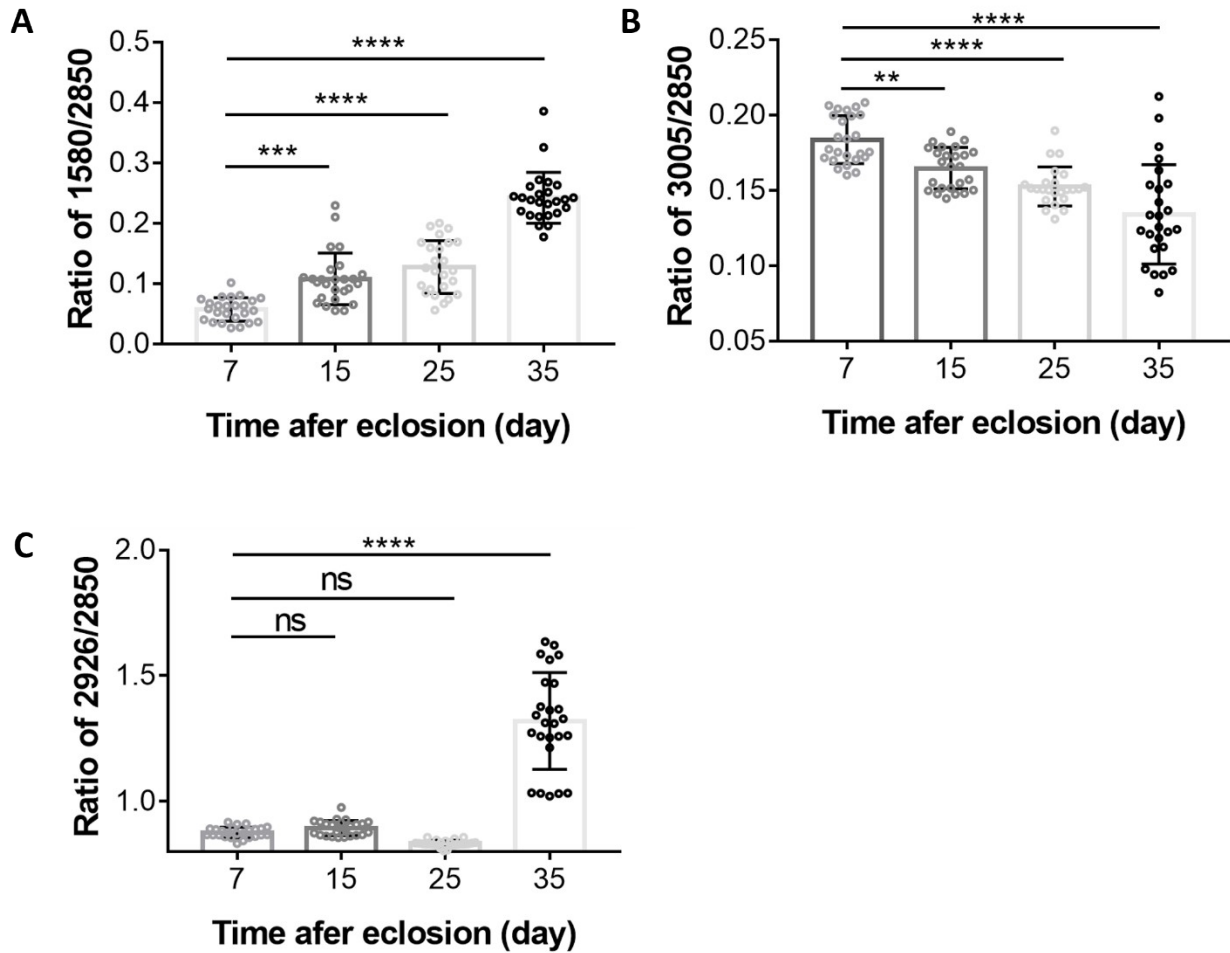

Fig. S1. (A), (B) and (C) The Raman peak ratios from 2926/2850, 3005/2850 and 1580/2850 were quantified from the spectra measured from fat body tissues of 7, 15, 25 and 35 day flies respectively and plotted as Mean  $\pm$  s.d.,  $n=25$ , from 3 or 5 different individuals for each group. The quantification results were shown as (mean  $\pm$  s.d). \*\*\*\* indicates  $p < 0.0001$ , \*\*\* indicates  $p < 0.001$ , \*\* indicates  $p < 0.01$  and ns indicates nonsignificant difference in an unpaired t test.

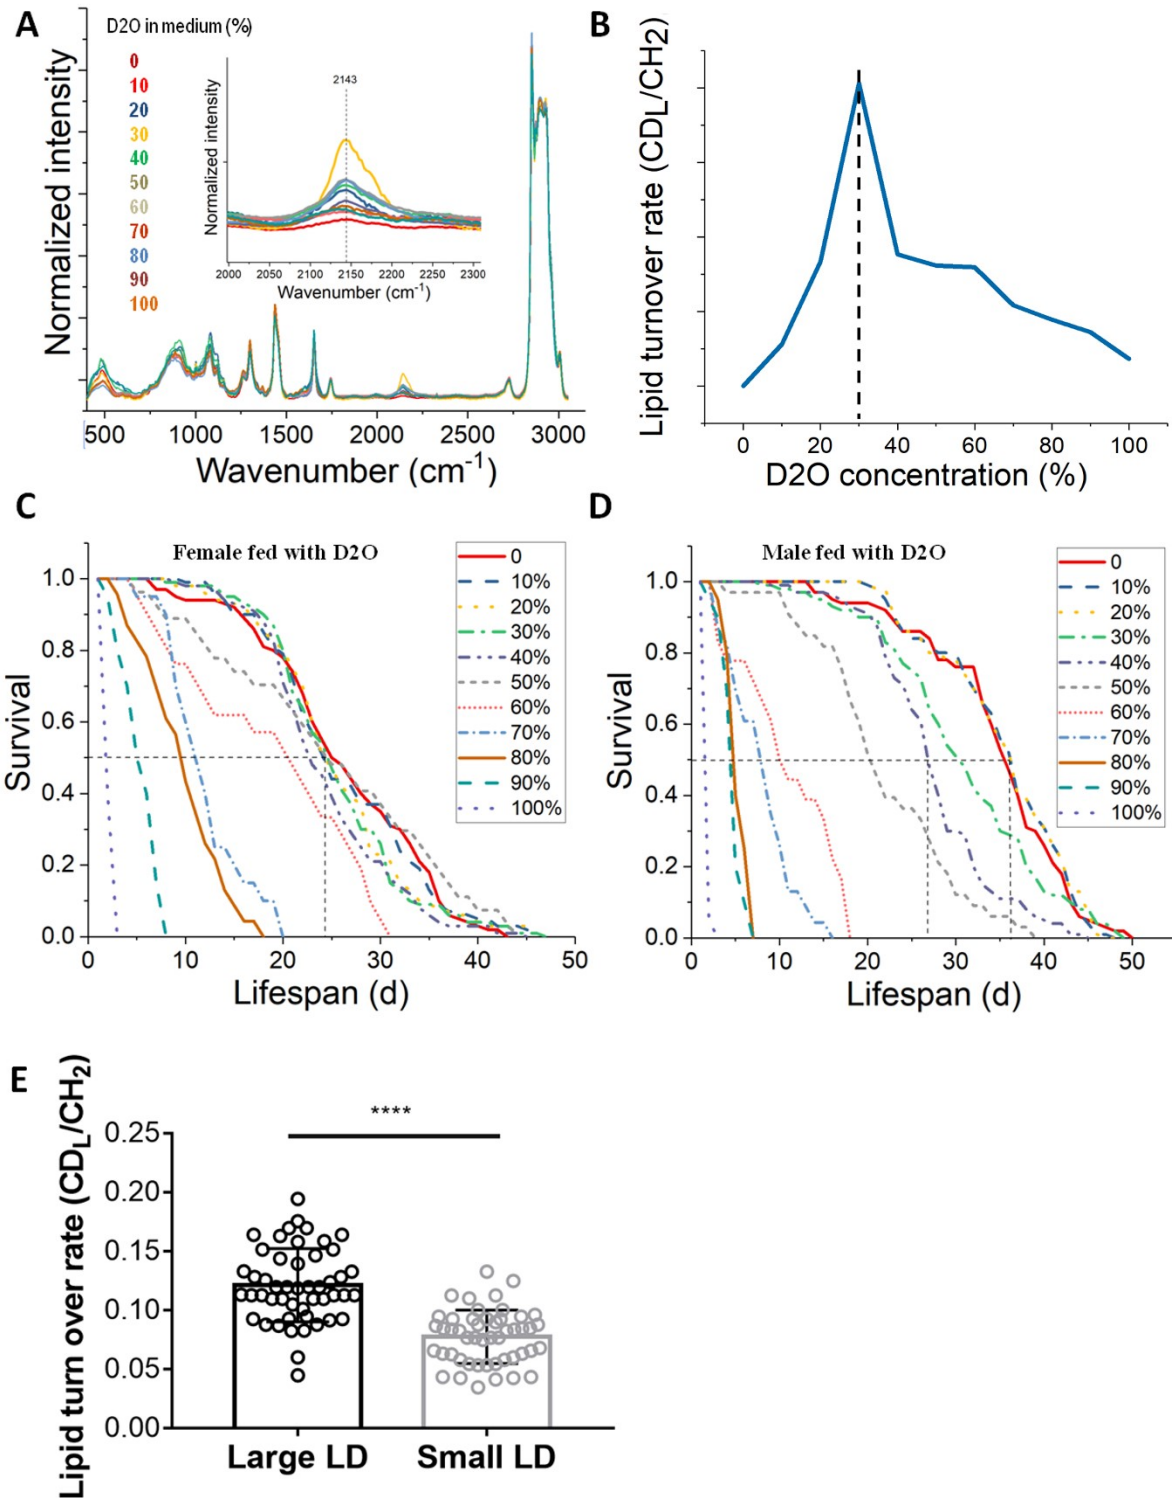

Fig. S2. High D2O concentration can inhibit metabolic activity and shorten lifespan. (A) Averaged fat body Raman spectra were obtained from flies grown in medium of different D2O concentration (0-100%). Each displayed spectrum was averaged from the spectra collected from 20-30 randomly selected fat body regions from 5 individual flies in each group. (B) The C-D signal was quantified

after 24h post-cultivation in medium with different D<sub>2</sub>O concentration. (C and D) The lifespan was measured in both female and male flies fed with medium with different D<sub>2</sub>O concentration. (E) The metabolic activity of large and small lipid droplets was quantified from the Raman spectra obtained from 5-day labeled 7-day adults. The results were shown as (mean ± s.d.) (n=50, from 3 individuals). \*\*\*\* indicates  $p < 0.0001$  in an unpaired t test.
